# Supplementary material
Source: PubMed Central journal article supplement (PMC8190943)
Supplement: sj-pdf-1-ine-10.1177_1591019920976673.pdf [file sj-pdf-1-ine-10.1177_1591019920976673.pdf]

|                                  |                          |                 |              |                 |      |
|----------------------------------|--------------------------|-----------------|--------------|-----------------|------|
| <b>Specimen with vessel wall</b> | ID                       | 2               | 90           | 218             | 296  |
|                                  | Gender                   | f               | m            | f               | m    |
|                                  | Age                      | 86,7            | 52,1         | 68,5            | 79,9 |
|                                  | mTX                      | none            | ASA          | none            | none |
|                                  | CVR                      | 1               | 1,2          | 1,2             | 2    |
|                                  | OtlM                     | 16h             | 7h           | 8,5h            | 6    |
|                                  | Bridging                 | yes             | no           | yes             | no   |
|                                  | Site                     | M2              | M1           | M1              | ACI  |
|                                  | Aspiration device        | 1               | 2            | 2               | 2    |
|                                  | Retriever                | 1               | 2            | 2               | 3    |
|                                  | Manoeuvres               | 2               | 1            | 3               | 3    |
|                                  | Stentriever in manoeuvre | 2               | 1            | 2,3             | 3    |
|                                  | Thrombus in manoeuvre    | 2*              | 1            | 2,3*            | 3*   |
|                                  | Vessel wall in Manoeuvre | 2               | 1            | 3               | 3    |
|                                  | mTICI                    | 3               | 2b           | 3               | 3    |
|                                  | Dissection: Location     | no              | no           | M1              | no   |
| Thrombus composition             | fresh                    | in organisation | multi-staged | in organisation |      |
| <b>Specimen with atheroma</b>    | ID                       | 138             | 155          | 179             | 291  |
|                                  | Gender                   | f               | m            | f               | m    |
|                                  | Age                      | 67,8            | 80,2         | 72,8            | 83,8 |
|                                  | mTX                      | none            | ASA          | ASA             | none |
|                                  | CVR                      | 1,3             | 1            | 1               | 4    |
|                                  | OtlM                     | 4,75h           | 8,25h        | 7h              | 4h   |
|                                  | Bridging                 | yes             | yes          | yes             | yes  |
|                                  | Site                     | M1              | BA           | HB              | BA   |
|                                  | Aspiration device        | 2               | 2            | 2               | 2    |
|                                  | Retriever                | none            | 1            | none            | none |
|                                  | Manoeuvres               | 1               | 3            | 1               | 1    |
|                                  | Stentriever in manoeuvre | 0               | 1,2,3        | 0               | 0    |
|                                  | Thrombus in Manoeuvre    | 1               | 1,2,3        | 1               | 1    |
|                                  | Atheroma in Manoeuvre    | 1               |              |                 |      |
|                                  | mTICI                    | 3               | 2b           | 3               | 3    |
|                                  | Dissection: Location     | none            | none         | none            | none |
| Thrombus composition             | fresh                    | fresh           | fresh        | fresh           |      |

mTX: pre stroke medication

CVR: cardiovascular risk factors: 1 = arterial hypertonia, 2= diabetes mellitus, 3= atrial fibrillation, 4= Intraventricular thrombus

OtlM: Stroke onset or time of last seen well to last manoeuvre

Bridging: i.v. rTPA before TE

Site: M(n): segment of ACM, BA= Basilar artery, HB= Head of BA

Aspirations Device: 1= Penumbra 5F 125cm, 2= Sofia 5/6F 125 cm

Retriever: 1= Solitaire FR 4mm/20mm (Micro Therapeutics Inc. /ev3 Neurovascular, Irvine, California USA), 2= pREset 4mm/20mm (phenox GmbH, Bochum, Germany), 3= Embotrap II 5mm/20mm (Cerenovus/Neuravi, Galway, Ireland)

Manoeuvres: count of aspiration thrombectomy procedures without/with stentriever

Stentriever in manoeuvre: Ordinal number of manoeuvre in which stentriever was used

Thrombus in manoeuvre: Ordinal number of manoeuvre in which thrombus was sampled

Vessel wall in Manoeuvre: Ordinal number of manoeuvre in which vessel wall was detected

Atheroma in Manoeuvre: Ordinal number of manoeuvre in which atheroma was detected

\* = Procedure change from sole aspiration to stentriever assisted aspiration TE
